# Supplementary material for: Understanding the charge transfer dynamics of the Cu2WS4–CNT–FeOOH ternary composite for photo-electrochemical studies
Source: Royal Society of Chemistry journal article supplement (doi:10.1039/d3cp03498d), 2023-01-01
Supplement: d3cp03498d1.pdf [file d3cp03498d1.pdf]

## Understanding the Charge Transfer Dynamics of Cu<sub>2</sub>WS<sub>4</sub>-CNT-FeOOH Ternary Composite for Photo-electrochemical Studies

*Preeti Dagar<sup>a</sup>, Nandan Ghorai<sup>a</sup>, Manisha Bungla<sup>b</sup>, Hirendra N. Ghosh<sup>a, c, d\*</sup> and Ashok K. Gangulb<sup>b, e, f\*</sup>*

*<sup>a</sup> Institute of Nano Science and Technology, Sector-81, Knowledge City, SAS Nagar, Punjab-140306, India*

*<sup>b</sup> Department of Chemistry, Indian Institute of Technology Delhi, Hauz Khas, New Delhi 110016, India*

*<sup>c</sup> Radiation & Photochemistry Division, Bhabha Atomic Research Centre, Trombay, Mumbai 400085, India*

*<sup>d</sup> Department of Chemical Sciences, National Institute of Science Education and Research Bhubaneswar, Jatni, Khurda 752050, Odisha, India*

*<sup>e</sup> Department of Materials Science and Engineering, Indian Institute of Technology Delhi, New Delhi-110016, India*

*<sup>f</sup> Department of Chemical Sciences, Indian Institute of Science Education & Research, Berhampur, Laudigam, Odisha 760003, India*

\* Authors for correspondence

E-mail: [ashok@chemistry.iitd.ac.in](mailto:ashok@chemistry.iitd.ac.in), [hngghosh@barc.gov.in](mailto:hngghosh@barc.gov.in), [hngghosh2004@gmail.com](mailto:hngghosh2004@gmail.com)

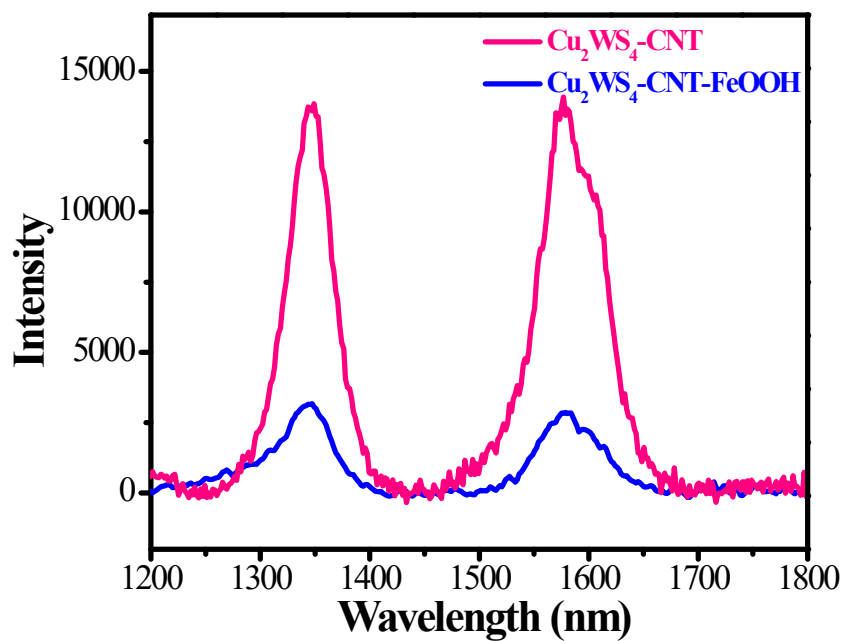

**Fig. S1** Raman spectra for  $\text{Cu}_2\text{WS}_4\text{-CNT}$  and  $\text{Cu}_2\text{WS}_4\text{-CNT-FeOOH}$ .

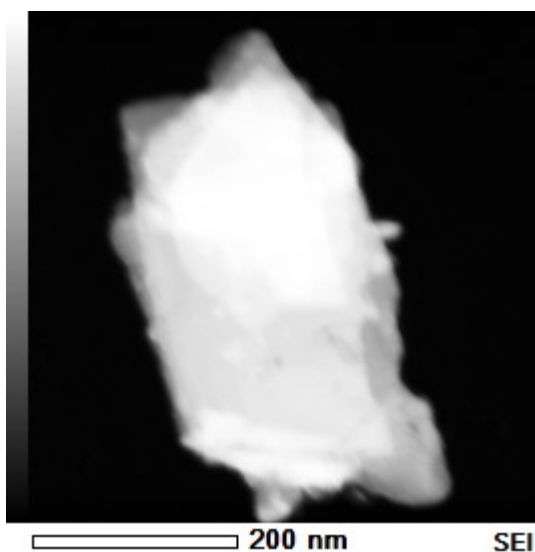

**Fig. S2** Area selected for transmission electron microscopy elemental mapping of  $\text{Cu}_2\text{WS}_4\text{-CNT-FeOOH}$ .

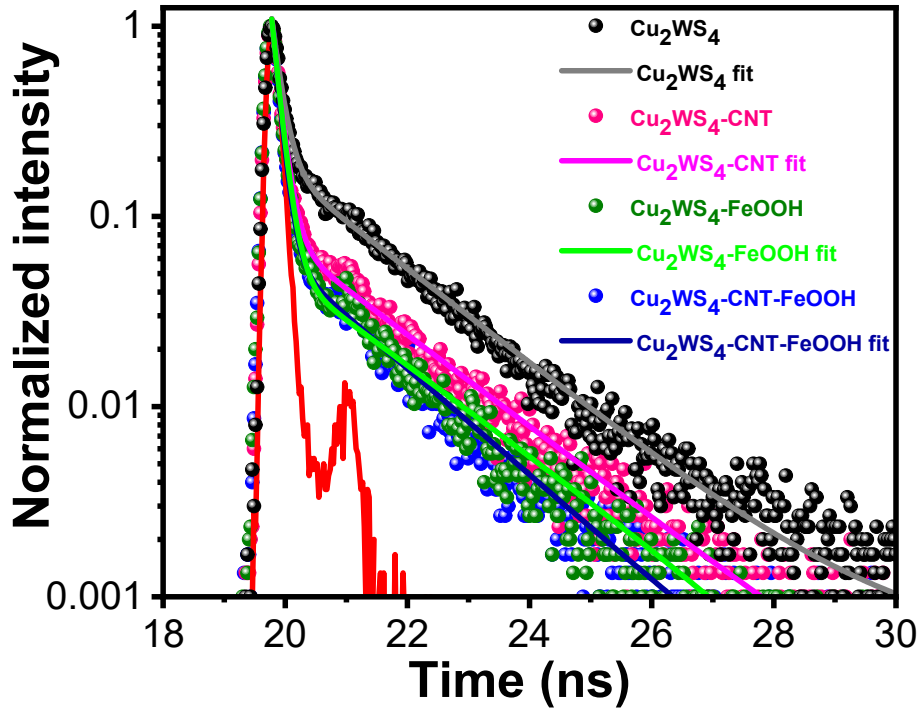

**Fig. S3** Time resolved photoluminescence (TRPL) decay curve at 350 nm excitation wavelength.

The TRPL data has been fit using the following equation

$$y = y_0 + A_1 * \exp\left(\frac{-(x - x_0)}{\tau_1}\right) + A_2 * \exp\left(\frac{-(x - x_0)}{\tau_2}\right)$$

Here,  $y_0$ ,  $x_0$ ,  $A$  to the y-offset of the exponential fit, x-offset, scaling factor and  $\tau$  is the decay time constant. The summary of TRPL fitting parameters of all samples is given in Table S1.

**Table S1.** Summary of TRPL fitting parameters of  $\text{Cu}_2\text{WS}_4$  and composite samples.

| Sample                              | $a_1$ | $\tau_1$ | $a_2$ | $\tau_2$ | $\tau_{avg}$ (ns) |
|-------------------------------------|-------|----------|-------|----------|-------------------|
| $\text{Cu}_2\text{WS}_4$            | 1.03  | 0.15     | 0.07  | 6.62     | 0.56              |
| $\text{Cu}_2\text{WS}_4$ - FeOOH    | 1.12  | 0.15     | 0.08  | 5.51     | 0.49              |
| $\text{Cu}_2\text{WS}_4$ -CNT       | 1.02  | 0.13     | 0.08  | 2.43     | 0.31              |
| $\text{Cu}_2\text{WS}_4$ -CNT-FeOOH | 1.35  | 0.13     | 0.06  | 2.58     | 0.23              |

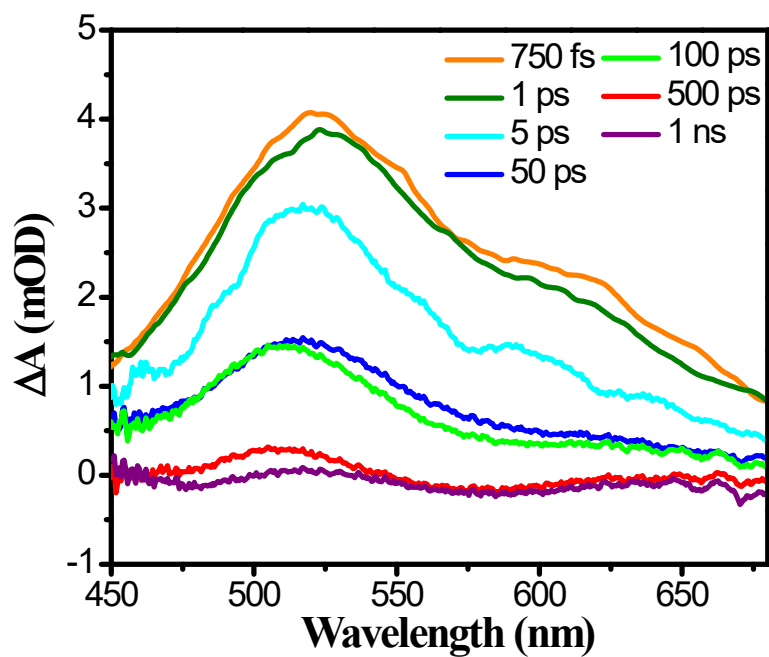

**Fig. S4** Transient absorption spectra of pristine FeOOH sample dispersed in ethanol solvent at different time delays after the 350 nm laser pump excitation.

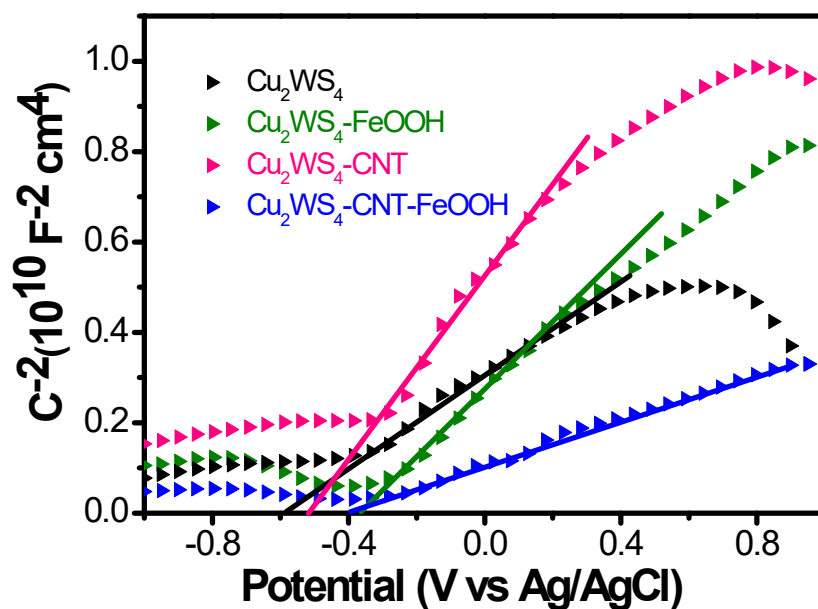

**Fig. S5** Mott-Schottky plot for  $\text{Cu}_2\text{WS}_4$  and composites.

**Table S2.** Comparison of current density values obtained @ 1.23 V and 1.8 V vs RHE in both dark and illuminated conditions.

| Sample                                     | Current density ( $\mu\text{A}/\text{cm}^2$ ) @1.23 V |         | Current density ( $\mu\text{A}/\text{cm}^2$ ) @1.8 V |         |
|--------------------------------------------|-------------------------------------------------------|---------|------------------------------------------------------|---------|
|                                            | Dark                                                  | Light   | Dark                                                 | Light   |
| Cu <sub>2</sub> WS <sub>4</sub>            | 0.06912                                               | 2.7715  | 0.2995                                               | 11.5842 |
| Cu <sub>2</sub> WS <sub>4</sub> -CNT       | 1.6227                                                | 9.3094  | 5.7958                                               | 35.0290 |
| Cu <sub>2</sub> WS <sub>4</sub> -FeOOH     | 0.7704                                                | 22.6016 | 2.3421                                               | 63.7840 |
| Cu <sub>2</sub> WS <sub>4</sub> -CNT-FeOOH | 0.5899                                                | 32.3281 | 4.7575                                               | 92.5006 |

**Table S3.** Comparison of Photocurrent densities obtained by ( $J_{light}-J_{dark}$ ) at 1.23 V and 1.8 V vs. RHE where  $J_{light}$  and  $J_{dark}$  are the current densities under light and dark conditions.

| Sample                                     | Photocurrent density ( $\mu\text{A}/\text{cm}^2$ ) @1.23 V | Photocurrent density ( $\mu\text{A}/\text{cm}^2$ ) @1.8 V |
|--------------------------------------------|------------------------------------------------------------|-----------------------------------------------------------|
| Cu <sub>2</sub> WS <sub>4</sub>            | 2.7023                                                     | 11.2847                                                   |
| Cu <sub>2</sub> WS <sub>4</sub> -CNT       | 7.6867                                                     | 29.2332                                                   |
| Cu <sub>2</sub> WS <sub>4</sub> -FeOOH     | 21.8312                                                    | 61.4419                                                   |
| Cu <sub>2</sub> WS <sub>4</sub> -CNT-FeOOH | 31.7382                                                    | 87.7431                                                   |

**Table S4.** ABPE values calculated at 1.0 V vs. RHE from the LSV curves.

| Sample                                     | ABPE (%) |
|--------------------------------------------|----------|
| Cu <sub>2</sub> WS <sub>4</sub>            | 0.0004   |
| Cu <sub>2</sub> WS <sub>4</sub> -CNT       | 0.0012   |
| Cu <sub>2</sub> WS <sub>4</sub> -FeOOH     | 0.0039   |
| Cu <sub>2</sub> WS <sub>4</sub> -CNT-FeOOH | 0.0062   |
